# Supplementary material for: Deep SAGE analysis of the Caenorhabditis elegans transcriptome
Source: PubMed Central journal article supplement — Nucleic Acids Res. 2010 Feb 3;38(10):3252–62. doi: 10.1093/nar/gkq035 (PMC2879516; doi:10.1093/nar/gkq035), 2010-02-03
Supplement: gkq035_1.pdf [file gkq035_1.pdf]

| Gene       | Locus name     | D2F15D1 | D2F15D6 | D2F15D10 | DAU | ODAU | N2YA | F15D1 | F15D2 | N2L1 | N2L2 | N2L3 | N2L2D | N2L1 starved |
|------------|----------------|---------|---------|----------|-----|------|------|-------|-------|------|------|------|-------|--------------|
| C24B5.2    | <i>spas-1</i>  | -1      | 0       | -3       | -2  | 2    | -2   | -2    | -8    | -3   | -1   | 0    | -1    | -1           |
| C29A12.3   | <i>lig-1</i>   | 0       | 1       | -1       | -1  | 0    | -2   | -1    | -5    | -1   | 0    | 0    | -1    | 0            |
| C32F10.1   | <i>obr-4</i>   | -1      | 0       | -4       | 1   | -2   | -6   | -7    | -3    | -3   | -7   | -5   | -9    | -6           |
| F58A4.7    | <i>hlh-11</i>  | -1      | 0       | -3       | -3  | -1   | -1   | -2    | 0     | -3   | 1    | -3   | -7    | -7           |
| H19M22.2   | <i>let-805</i> | 0       | 0       | 0        | 1   | 0    | 0    | -1    | -3    | -10  | -4   | -4   | -5    | 0            |
| K11D9.2    | <i>sca-1</i>   | -4      | 0       | -2       | 48  | 5    | -1   | 8     | -19   | 25   | 15   | 40   | 24    | 60           |
| R03G5.1    | <i>eft-4</i>   | -2      | 0       | -5       | 2   | 1    | -1   | -8    | -4    | -43  | -25  | -33  | -14   | 10           |
| R03G5.1    | <i>eft-4</i>   | -2      | 0       | -5       | -1  | -5   | 1    | -4    | -7    | -35  | -20  | -32  | -13   | 8            |
| R06C7.5    |                | 0       | 0       | -2       | 0   | -2   | -4   | -1    | -1    | -1   | -6   | 3    | -7    | -1           |
| T08B2.5    |                | 0       | 1       | 0        | -6  | -4   | -1   | -2    | -1    | -2   | -1   | -1   | -3    | -6           |
| W02B12.3   | <i>rsp-1</i>   | 1       | 5       | 1        | 0   | 0    | 2    | 0     | 6     | 2    | -3   | 1    | 3     | -3           |
| W10D5.3    |                | 1       | 0       | -7       | 1   | -17  | 0    | -7    | -5    | -7   | -4   | -7   | -12   | -5           |
| Y110A7A.17 |                | 0       | 0       | 0        | -2  | -1   | -5   | -1    | -4    | -1   | 1    | -1   | 0     | 0            |
| Y47H9C.4   |                | -4      | 1       | -5       | -7  | -3   | -3   | -6    | -17   | -4   | -3   | -2   | -12   | 3            |
| ZK1098.10  |                | 0       | 0       | 1        | 1   | -7   | -2   | -2    | -1    | -1   | -3   | -2   | -2    | -10          |

### Supplementary Table 1A

Difference in tag count between longer and shorter isoforms in SAGE libraries. Data shown for genes with a putative switch between short and long splice variants. *Abbreviations:* D2 = *daf-2*, F15 = *fer-15*, D\_x = Day\_x, N2YA = N2 Young Adults, N2Lx = N2 larval stages. DAU = N2 dauers, ODAU = 14-days old N2 dauers.

| Gene       | Locus name     | DF215D1.2 | D2F15D6.2 | N2L3.1 | DAU.2 | D2F15D10.2 | D2F15D6.1 | D2F15D6.2 | N2L1 starved.1 | D2F15D1.2 | D2F15D1.1 | N2L2.2 | N2L1S.2 | N2L2D.1 | F15D1.1 | N2L1.1 | ODAU.1 | D2F15D10.1 | N2L1.2 | N2L2.1 | DAU.1 | N2L1 starved.3 | N2L3.2 | N2L1.3 | N2L2D.2 | F15D6 | N2YA.1 |
|------------|----------------|-----------|-----------|--------|-------|------------|-----------|-----------|----------------|-----------|-----------|--------|---------|---------|---------|--------|--------|------------|--------|--------|-------|----------------|--------|--------|---------|-------|--------|
| C01G6.1    | <i>aqp-2</i>   | 83        | 0         | 16     | 21    | 0          | 11        | 30        | 16             | -7        | 8         | 9      | 15      | 0       | 41      | 2      | 6      | 3          | 18     | 18     | 78    | 189            | 4      | 123    | 8       | 39    | 179    |
| C02C6.2    | <i>olm-1</i>   | -51       | -42       | -99    | -32   | -63        | -254      | -10       | 5              | -50       | -2        | -19    | -101    | -93     | -36     | -2     | -29    | -23        | -29    | -24    | -54   | -96            | -176   | -19    | -75     | -24   | -64    |
| C06B8.2    |                | 0         | 0         | -2     | 2     | 0          | -5        | -5        | 0              | -3        | 0         | 0      | -13     | 0       | 0       | 0      | 0      | 0          | 0      | 0      | 0     | 0              | 0      | -4     | 0       | 0     | 0      |
| C08D8.2    | <i>tmd-2</i>   | 3         | 13        | 15     | 1     | 5          | 91        | 46        | 2              | -9        | -52       | -7     | 8       | 3       | -2      | 19     | 10     | 34         | 4      | -1     | 27    | 34             | -58    | 10     | -24     | 7     | 0      |
| C09G4.2    |                | -31       | 0         | -7     | -4    | 10         | -3        | -20       | -17            | 14        | 9         | -1     | -4      | 4       | 31      | -4     | -15    | 0          | 25     | 3      | 15    | 16             | -5     | 2      | 0       | 1     | 6      |
| C17G10.6   |                | 4         | 0         | -5     | -25   | 8          | -46       | -4        | 5              | 9         | 26        | 0      | -4      | 0       | -3      | -3     | 0      | 86         | -3     | 29     | 24    | 0              | 113    | 0      | -6      | 35    | -3     |
| C18A11.5   | <i>xol-1</i>   | 0         | 0         | 0      | 0     | 0          | 0         | -6        | -4             | 2         | 0         | -4     | 0       | 0       | 0       | 0      | 0      | 0          | 0      | 0      | -4    | 0              | 0      | 0      | 0       | 0     | 0      |
| C23G10.1   |                | 0         | -18       | 0      | 0     | -7         | 0         | -16       | -2             | -15       | 0         | 0      | 0       | 0       | 0       | 2      | -15    | 0          | 0      | 0      | 0     | 0              | 0      | 0      | 0       | 0     | 0      |
| C25E10.3   | <i>srsx-34</i> | 7         | 0         | 15     | -21   | 0          | -6        | 0         | -4             | 3         | -20       | 0      | 0       | 0       | 0       | 0      | 0      | 0          | 3      | -2     | -10   | 0              | -19    | 2      | 0       | -17   | 0      |
| C28H8.6    | <i>pxl-1</i>   | 135       | 129       | 127    | 265   | -2         | 699       | 67        | 46             | 45        | 16        | 33     | 56      | 15      | 57      | 25     | 100    | 183        | 55     | 157    | 257   | 44             | 143    | 163    | 32      | 3     | 5      |
| C29E4.5    | <i>tag-250</i> | -3        | -32       | -10    | -9    | -32        | -32       | -6        | 6              | -20       | -4        | -5     | -7      | -11     | -7      | 0      | 1      | -2         | -9     | -24    | -9    | -10            | -24    | -3     | 0       | -8    | -8     |
| C36F7.4    | <i>rig-5</i>   | -2        | 0         | -2     | 3     | 0          | 10        | 0         | 0              | 53        | 0         | 0      | 0       | 2       | 0       | 0      | 0      | -2         | 0      | 0      | 5     | 8              | -2     | 0      | 0       | 0     | 14     |
| C37A2.4    | <i>cye-1</i>   | 0         | 0         | -3     | 0     | 2          | 0         | -32       | -7             | -24       | 0         | -27    | 0       | -7      | -2      | 0      | -6     | 0          | 2      | 0      | 0     | 0              | -2     | 0      | -7      | -173  | 0      |
| C47B2.2    |                | 21        | 0         | -27    | 0     | 37         | -8        | 47        | 57             | 31        | 52        | 65     | -9      | -22     | 8       | 17     | -9     | -2         | 11     | -5     | 6     | 1              | -2     | -1     | 0       | 45    | 133    |
| C52B9.2    |                | -27       | -8        | 3      | -35   | -1         | -1        | 1         | -5             | -35       | 2         | 5      | -13     | 0       | 3       | 0      | -22    | -14        | 2      | -10    | 7     | 11             | -120   | -3     | 15      | 3     | -1     |
| C54G10.4   |                | -59       | 0         | 0      | -6    | 0          | -13       | 0         | -8             | -4        | 2         | 0      | -12     | 0       | -3      | 0      | 0      | -7         | 0      | -2     | 0     | -2             | -3     | -21    | -3      | -9    | 0      |
| D2089.1    | <i>rsp-7</i>   | -86       | -111      | -201   | -105  | -122       | -221      | -393      | -73            | -222      | 8         | -334   | -144    | -77     | -119    | -12    | -116   | -50        | -74    | -66    | -68   | -168           | -42    | -100   | -47     | -143  | -918   |
| E01H11.1   | <i>pkc-2</i>   | 11        | -21       | -83    | -44   | -1         | -163      | 44        | 20             | 2         | -1        | 18     | -44     | 0       | -9      | -4     | -10    | -23        | -4     | -41    | -35   | -26            | -34    | -25    | -19     | -26   | 14     |
| E02C12.8   |                | -126      | 0         | -10    | -3    | 0          | -5        | -17       | 2              | 0         | -2        | -13    | -8      | -38     | -9      | 4      | -10    | 0          | -5     | -2     | -6    | 0              | -12    | -2     | 0       | 0     | 3      |
| F12F3.1    | <i>exp-2</i>   | -9        | -20       | 78     | 3     | 4          | 23        | -5        | 1              | 7         | 10        | 0      | 17      | 32      | 9       | 0      | 4      | 21         | -9     | -13    | 17    | 5              | -32    | 10     | -16     | 12    | -2     |
| F14H12.4   | <i>cst-1</i>   | 10        | 4         | -5     | 33    | 4          | 194       | 15        | -34            | -61       | 57        | 4      | 3       | 18      | 14      | 0      | 2      | 17         | 12     | 22     | 49    | 13             | 13     | 9      | 32      | 30    | 58     |
| F28E10.1   |                | -3        | 0         | -2     | 0     | 0          | -42       | -6        | 0              | -2        | 3         | 0      | 0       | 0       | -4      | -3     | 0      | -2         | -3     | 0      | -4    | -4             | -2     | 0      | 0       | -8    | -8     |
| F28H6.1    | <i>akt-2</i>   | -7        | 0         | 5      | -6    | 0          | 26        | -1        | 0              | 14        | 4         | 0      | 18      | 0       | 0       | 0      | 6      | 2          | 4      | 0      | 0     | 0              | 4      | -2     | 0       | -2    | 0      |
| F29F11.5   | <i>ceh-22</i>  | 0         | 0         | 26     | 18    | 0          | 27        | 1         | 2              | -2        | 1         | 0      | 18      | 0       | -1      | -10    | 13     | 3          | 5      | 52     | 14    | 13             | 21     | -1     | 31      | -2    | 0      |
| F31F7.1    |                | 104       | 28        | -348   | -62   | 2          | -265      | 100       | 87             | -291      | 15        | 58     | -131    | -172    | 31      | 14     | -54    | -81        | 6      | -63    | -62   | -5             | -185   | -31    | -24     | 38    | -2     |
| F35A5.8    | <i>erp-1</i>   | -1        | -13       | -97    | -21   | 8          | -99       | 9         | 0              | 4         | -9        | 14     | -25     | 0       | -22     | 0      | -12    | -15        | -36    | -42    | -108  | -37            | -54    | -10    | -22     | 2     | 84     |
| F38A5.3    | <i>lec-11</i>  | -7        | -5        | -6     | 1     | -22        | -20       | -36       | -216           | -37       | -25       | -41    | -18     | -6      | -28     | -87    | -44    | -6         | -86    | 2      | -2    | -4             | 2      | -5     | 1       | -19   | 24     |
| F42A10.2   | <i>nfm-1</i>   | 9         | -3        | 4      | 16    | 9          | 57        | 31        | 21             | 33        | 2         | 15     | 4       | 7       | 4       | 4      | 1      | 6          | 5      | 7      | 10    | 6              | 5      | 10     | 13      | 14    | 105    |
| F57C9.4    |                | -3        | -35       | -4     | 1     | 1          | -3        | -10       | 7              | 9         | -9        | -32    | 0       | -28     | -1      | -1     | -4     | -2         | 0      | 0      | -1    | -5             | -5     | 1      | 0       | 25    | -49    |
| H19M22.2   | <i>let-805</i> | -45       | 16        | 18     | 2     | 0          | 41        | -43       | -3             | -3        | 6         | -7     | -8      | 0       | 1       | 0      | 0      | 24         | 0      | 8      | 51    | 26             | 5      | -24    | -2      | 8     | -21    |
| K02A6.3    |                | -18       | 4         | -20    | -23   | -1         | -85       | -8        | -4             | -11       | 3         | -2     | -14     | -2      | -5      | 0      | -2     | -59        | -22    | -18    | -122  | -130           | -24    | -22    | 0       | -1    | -8     |
| K04H4.2    |                | 0         | -16       | -3     | -12   | 0          | -6        | 18        | 0              | 0         | 0         | -16    | 0       | 7       | 0       | -4     | 0      | 7          | -27    | -4     | 0     | -24            | 0      | -19    | -2      | -1    | -1     |
| K10D6.2    |                | 2         | -3        | 9      | 2     | 3          | -4        | 4         | 3              | -2        | 14        | 4      | 7       | 0       | 41      | 21     | 2      | -2         | -2     | -4     | -11   | -33            | -11    | -4     | 0       | 13    | 23     |
| M04G12.1   | <i>tag-260</i> | 18        | -19       | 16     | 15    | -3         | 26        | 12        | -6             | 1         | 11        | -9     | 0       | 0       | 27      | -2     | 0      | 4          | 24     | 3      | 6     | 41             | 0      | 48     | -9      | 43    | 19     |
| R05F9.1    |                | 0         | 0         | 0      | 0     | 0          | 0         | 0         | 0              | 2         | 0         | 0      | 0       | 2       | 0       | 0      | 0      | 0          | 0      | 0      | 4     | 0              | 0      | 0      | 0       | 2     | 0      |
| R151.5     | <i>dpy-31</i>  | -9        | 3         | 0      | -1    | 0          | -2        | 6         | 9              | 7         | -28       | 3      | -7      | 4       | 0       | 0      | -5     | 0          | -10    | 2      | 4     | 0              | -2     | -1     | 0       | 10    | 13     |
| T01C8.1    | <i>aak-2</i>   | -63       | 1         | -259   | -156  | -76        | -924      | -1        | -36            | -143      | -50       | -8     | -173    | -44     | -6      | 0      | -74    | -34        | -56    | -67    | -28   | -6             | -220   | -40    | -88     | -37   | 28     |
| T05H4.13   | <i>alh-4</i>   | 17        | -124      | -138   | 47    | 72         | -96       | 20        | -10            | 13        | 38        | -16    | -74     | 5       | -7      | -4     | -28    | -10        | -4     | -3     | -62   | -35            | 3      | 3      | -55     | 57    | 69     |
| T07C4.9    | <i>nex-2</i>   | -20       | 0         | -2     | -7    | -22        | 2         | -3        | -4             | 2         | -3        | -1     | -7      | -9      | -5      | -8     | -16    | 0          | -11    | -2     | 0     | 0              | -6     | 2      | -3      | 3     | 0      |
| T07C5.1    | <i>ugt-50</i>  | -32       | -93       | 31     | -22   | -10        | 93        | -31       | -15            | -12       | -9        | -14    | -2      | -26     | -44     | -2     | -19    | 13         | -1     | -16    | 26    | 27             | -125   | 12     | -12     | -6    | 44     |
| T09B4.5    |                | 3         | 0         | 7      | 0     | -10        | 3         | -2        | -9             | 18        | 0         | 26     | 3       | -39     | 1       | -1     | 0      | 0          | -2     | -3     | -2    | 8              | 2      | 23     | 10      | 3     | 15     |
| T19B10.4   | <i>pqn-70</i>  | 2         | 21        | 17     | 7     | 123        | 27        | 12        | -1             | 152       | 8         | 5      | 10      | 71      | 10      | -2     | 0      | 19         | 7      | 7      | 21    | 19             | 17     | 14     | 10      | 19    | 291    |
| T19D12.2   |                | -53       | -11       | -66    | -71   | 15         | -594      | -51       | -26            | -45       | 64        | -6     | -11     | -18     | -34     | -5     | -31    | -75        | -18    | -17    | -113  | -1             | -8     | -28    | -5      | 1     | -4     |
| T26A5.5    |                | -3        | 18        | 5      | 16    | 265        | 18        | 7         | 7              | 316       | -13       | 44     | -2      | 13      | -6      | 6      | 20     | 1          | -7     | -3     | -26   | 28             | 4      | 8      | -1      | -19   | -190   |
| T27C4.4    | <i>lin-40</i>  | -3        | 0         | 0      | 0     | 0          | 0         | 2         | -1             | 0         | 9         | 4      | 0       | 0       | -3      | 0      | 0      | 0          | 0      | 0      | 0     | 6              | 0      | 0      | 0       | 7     | 2      |
| W02B12.3   | <i>rsp-1</i>   | 172       | 17        | 47     | 5     | 153        | -78       | 132       | 151            | 124       | 255       | 394    | 0       | 47      | 112     | 129    | 4      | 12         | 202    | 11     | -38   | 613            | 5      | 510    | 21      | 226   | 156    |
| W10D5.3    | <i>gei-17</i>  | -16       | 212       | -130   | 63    | 2279       | -542      | -24       | 20             | 188       | 26        | 68     | 20      | 372     | -8      | 1      | 174    | -6         | 39     | 57     | -31   | 2              | 116    | -8     | 80      | -55   | -123   |
| Y113G7B.5  | <i>fog-2</i>   | -13       | 0         | 0      | 0     | 3          | 0         | 4         | 7              | 10        | 2         | 1      | 0       | 24      | -6      | 2      | -2     | 0          | -7     | 0      | 0     | 0              | 0      | 0      | 0       | 8     | 5      |
| Y116A8C.26 |                | -9        | 0         | 0      | 0     | -9         | 0         | -10       | -1             | 3         | -13       | -8     | 0       | 0       | -6      | 5      | -6     | 0          | 0      | 4      | -10   | -2             | 0      | 0      | -24     | -11   | -13    |
| Y40C5A.4   |                | -12       | 0         | -21    | -172  | -16        | -203      | -4        | -6             | -9        | -66       | 0      | -22     | 0       | -7      | 3      | 0      | -39        | 9      | -18    | -52   | -25            | -49    | -5     | -15     | -92   | 3      |
| Y47D3A.6   | <i>tra-1</i>   | 0         | 0         | 3      | 2     | -10        | 18        | -3        | -4             | -5        | -5        | -2     | 7       | 0       | 2       | 0      | 0      | 3          | -2     | 1      | 2     | -7             | 6      | 3      | 0       | 9     | -5     |
| Y54F10AL.2 | <i>smg-6</i>   | -57       | -42       | -83    | -19   | -11        | -40       | 31        | 102            | 17        | -36       | 100    | -57     | -5      | -40     | 58     | 11     | -24        | -32    | -14    | 10    | -7             | -73    | -53    | -52     | 7     | 499    |
| Y55B1BM.1  | <i>stim-1</i>  | -28       | -36       | -21    | -31   | -151       | -67       | -18       | 5              | -74       | -36       | 1      | -14     | -14     | -15     | 37     | -10    | -17        | -26    | -10    | -37   | -90            | -60    | -67    | -8      | 3     | 37     |
| Y55F3AM.6  |                | 2         | 0         | -8     | 2     | 2          | 3         | 17        | -5             | 12        | -21       | 21     | 3       | 20      | 3       | 0      | 2      | 0          | 0      | 2      | -5    | 0              | 3      | -2     | 0       | 0     | 2      |
| Y67D8C.10  | <i>mca-3</i>   | -88       | 4         | -94    | -51   | -44        | -41       | -103      | -42            | -95       | -50       | -73    | -68     | -53     | -85     | -5     | -76    | -7         | -52    | -52    | -1    | 7              | -79    | -39    | -36     | -27   | -14    |
| Y69A2AR.2  | <i>ric-8</i>   | -4        | -20       | -2     | -3    | -15        | -8        | -11       | 2              | -9        | -2        | -5     | 0       | -8      | -3      | -5     | -3     | 0          | -2     | 0      | 0     | -7             | -7     | -5     | 0       | -5    | -24    |
| Y69A2AR.7  |                | 116       | 24        | -21    | 89    | 5          | 67        | 30        | 244            | 30        | 15        | 44     | -125    | -52     | 45      | 29     | -17    | 49         | 13     | 35     | 123   | 29             | -10    | 22     | -18     | 119   | 178    |
| Y69H2.10   |                | 3         | -2        | 3      | 19    | 5          | 28        | 4         | 2              | 4         | 23        | 0      | 2       | 0       | 9       | 2      | 2      | 0          | 2      | 6      | 10    | 14             | 24     | 1      | 0       | 36    | 8      |
| Y71G10AL.1 |                | -3        | -2        | 0      | 0     | -13        | -2        | 5         | 0              | -3        | -18       | 0      | 0       | 0       | 0       | 0      | -5     | 0          | -4     | 0      | 0     | -3             | 0      | -3     | 0       | -15   | -18    |
| Y77E11A.13 | <i>npp-20</i>  | -69       | 10        | -39    | -13   | 0          | -52       | -73       | -47            | -85       | 2         | -66    | -6      | 6       | -28     | -22    | -26    | -2         | -9     | -11    | -33   | -44            | -1     | -34    | -5      | -45   | -259   |
| ZK1128.6   | <i>tll-4</i>   | 62        | 62        | 28     | 12    | -3         | 81        | 62        | 20             | 136       | 32        | 114    | 19      | 46      | 24      | 6      | 27     | 10         | 17     | 34     | 17    | 12             | 49     | 14     | 13      | 39    | 44     |
| ZK1151.1   | <i>vab-10</i>  | -23       | -19       | -4     | -3    | -4         | -16       | -42       | -5             |           |           |        |         |         |         |        |        |            |        |        |       |                |        |        |         |       |        |

D<sub>x</sub> = Day<sub>x</sub>, N2YA = N2 Young Adults, N2L<sub>x</sub> = N2 larval stages. DAU = N2 dauers, ODAU = 14-days old N2 dauers. “<sub>x</sub>” shows the replicate number.
