# Supplementary material for: Deep SAGE analysis of the Caenorhabditis elegans transcriptome
Source: PubMed Central journal article supplement — Nucleic Acids Res. 2010 Feb 3;38(10):3252–62. doi: 10.1093/nar/gkq035 (PMC2879516; doi:10.1093/nar/gkq035), 2010-02-03
Supplement: gkq035_3.pdf [file gkq035_3.pdf]

| CDS        | Gene      | D2F15D1_1 | D2F15D1_2 | D2F15D6_1 | D2F15D6_2 | D2F15D10_1 | D2F15D10_2 | N2YA | F15D1_1 | F15D1_2 | F15D6_1 | F15D6_2 |
|------------|-----------|-----------|-----------|-----------|-----------|------------|------------|------|---------|---------|---------|---------|
| B0563.9    |           | 23        | 1         | 1         | 2         | 3          | 3          |      | 0       | 0       | 0       | 1       |
| C02F5.8    | tsp-1     | 62        | 7         | 156       | 97        | 32         | 105        |      | 3       | 2       | 3       | 27      |
| C06A5.12   |           | 31        | 24        | 20        | 49        | 20         | 34         |      | 8       | 4       | 2       | 6       |
| C07A12.2   |           | 1         | 6         | 10        | 18        | 1          | 19         |      | 1       | 1       | 0       | 3       |
| C08A9.1    | sod-3     | 5         | 41        | 92        | 96        | 5          | 106        |      | 5       | 2       | 3       | 7       |
| C13A10.2   |           | 4         | 7         | 14        | 10        | 2          | 5          |      | 3       | 1       | 0       | 0       |
| C25G4.1    | cllec-185 | 9         | 1         | 5         | 12        | 7          | 5          |      | 0       | 0       | 0       | 2       |
| C33E10.2   | fbxa-120  | 1         | 4         | 1         | 17        | 1          | 1          |      | 1       | 0       | 0       | 0       |
| C47E8.3    |           | 1         | 1         | 0         | 2         | 0          | 2          |      | 0       | 0       | 0       | 0       |
| C53B7.3    |           | 297       | 243       | 2097      | 2169      | 702        | 1353       |      | 101     | 102     | 77      | 579     |
| D1007.19   |           | 4         | 2         | 12        | 17        | 12         | 9          |      | 2       | 1       | 0       | 0       |
| F10E9.10   |           | 1         | 3         | 0         | 5         | 1          | 2          |      | 0       | 0       | 0       | 0       |
| F15E6.5    |           | 21        | 1         | 9         | 15        | 3          | 5          |      | 0       | 0       | 0       | 0       |
| F21C10.11  |           | 265       | 121       | 324       | 487       | 213        | 239        |      | 14      | 21      | 24      | 65      |
| F28B4.4    |           | 3         | 1         | 2         | 2         | 6          | 10         |      | 3       | 1       | 0       | 0       |
| F40G12.4   |           | 1         | 1         | 2         | 4         | 0          | 1          |      | 0       | 0       | 0       | 0       |
| F48D6.3    | hlh-13    | 24        | 7         | 15        | 49        | 21         | 8          |      | 0       | 1       | 0       | 0       |
| H39E23.2   |           | 11        | 1         | 5         | 4         | 0          | 4          |      | 0       | 0       | 0       | 0       |
| H39E23.3   |           | 59        | 5         | 575       | 844       | 4          | 178        |      | 0       | 0       | 0       | 6       |
| K04A8.5    |           | 2         | 10        | 3         | 50        | 3          | 8          |      | 0       | 0       | 1       | 0       |
| K04A8.8    | spp-20    | 26        | 2         | 20        | 10        | 26         | 14         |      | 0       | 0       | 0       | 0       |
| K05C4.8    |           | 11        | 4         | 8         | 15        | 20         | 6          |      | 0       | 1       | 1       | 0       |
| K06G5.2    | cyp-13B2  | 1         | 4         | 7         | 31        | 1          | 12         |      | 3       | 0       | 0       | 3       |
| R11D1.3    |           | 2         | 63        | 9         | 37        | 0          | 18         |      | 6       | 0       | 31      | 7       |
| T23F2.4    |           | 29        | 4         | 37        | 54        | 10         | 40         |      | 0       | 2       | 0       | 10      |
| T25B9.3    |           | 1         | 8         | 3         | 8         | 1          | 2          |      | 1       | 0       | 0       | 0       |
| W10G11.2   |           | 9         | 9         | 13        | 8         | 11         | 10         |      | 1       | 2       | 1       | 0       |
| Y37E11B.7  |           | 633       | 117       | 38        | 34        | 21         | 29         |      | 17      | 9       | 21      | 6       |
| Y38E10A.11 |           | 36        | 2         | 21        | 15        | 2          | 7          |      | 1       | 0       | 0       | 2       |
| Y38E10A.25 |           | 4         | 4         | 2         | 1         | 0          | 1          |      | 1       | 0       | 2       | 0       |
| Y53F4B.12  |           | 6         | 10        | 7         | 5         | 6          | 6          |      | 2       | 1       | 0       | 0       |
| Y57E12B.4  |           | 3         | 9         | 230       | 22        | 1          | 160        |      | 0       | 0       | 0       | 2       |
| Y60A3A.14  |           | 4         | 2         | 1         | 2         | 0          | 1          |      | 1       | 0       | 1       | 0       |
| Y60C6A.1   |           | 2         | 1         | 133       | 2         | 0          | 20         |      | 0       | 0       | 0       | 1       |
| ZK1290.10  |           | 1         | 4         | 11        | 23        | 1          | 8          |      | 0       | 0       | 0       | 4       |

Note: all counts were normalized to 1M tags

### Supplementary Table 4A

Genes consistently up-regulated in *daf-2;fer-15* adults when compared to normal-lived *C. elegans*.

Abbreviations: D2 = *daf-2*, F15 = *fer-15*, D\_x = Day\_x, N2YA = N2 Young Adults.

| CDS       | Gene    | D2F15D1_1 | D2F15D1_2 | D2F15D6_1 | D2F15D6_2 | D2F15D10_1 | D2F15D10_2 | N2YA | F15D1_1 | F15D1_2 | F15D6_1 | F15D6_2 |     |
|-----------|---------|-----------|-----------|-----------|-----------|------------|------------|------|---------|---------|---------|---------|-----|
| B0041.2   |         | 4         | 2         | 21        | 7         | 20         | 6          |      | 46      | 43      | 15      | 154     | 16  |
| C04F6.1   | vit-5   | 32        | 53        | 10        | 83        | 467        | 72         |      | 2992    | 932     | 130     | 3252    | 955 |
| C09D4.5   | rpl-19  | 187       | 201       | 944       | 196       | 853        | 149        |      | 1163    | 2405    | 842     | 2612    | 588 |
| C29E4.8   | let-754 | 1         | 2         | 1         | 1         | 0          | 2          |      | 12      | 20      | 18      | 16      | 4   |
| C29F9.7   | pat-4   | 1         | 4         | 2         | 1         | 3          | 1          |      | 9       | 21      | 19      | 26      | 3   |
| C37C3.6   | ppn-1   | 3         | 69        | 46        | 5         | 14         | 11         |      | 25      | 496     | 269     | 41      | 19  |
| C49G7.3   |         | 10        | 23        | 47        | 5         | 77         | 6          |      | 7       | 61      | 107     | 87      | 35  |
| C51E3.9   |         | 1         | 5         | 7         | 1         | 3          | 1          |      | 3       | 17      | 22      | 7       | 2   |
| F09B9.3   | erd-2   | 11        | 3         | 10        | 1         | 10         | 1          |      | 22      | 48      | 19      | 68      | 2   |
| F13G3.11  |         | 6         | 9         | 12        | 10        | 6          | 13         |      | 37      | 30      | 47      | 34      | 28  |
| F21F8.3   | asp-5   | 61        | 17        | 55        | 4         | 260        | 6          |      | 149     | 472     | 71      | 768     | 20  |
| F25B4.9   | clec-1  | 32        | 10        | 44        | 6         | 93         | 3          |      | 63      | 188     | 34      | 224     | 17  |
| F27E5.1   |         | 8         | 18        | 26        | 14        | 23         | 6          |      | 65      | 47      | 59      | 35      | 38  |
| F29C4.2   |         | 64        | 21        | 20        | 4         | 45         | 6          |      | 120     | 321     | 47      | 316     | 15  |
| F36A4.7   | ama-1   | 1         | 2         | 17        | 6         | 17         | 7          |      | 18      | 36      | 14      | 387     | 62  |
| F40F11.1  | rps-11  | 388       | 141       | 244       | 61        | 404        | 90         |      | 1210    | 2701    | 261     | 1590    | 181 |
| F49D11.8  | cpn-4   | 21        | 20        | 12        | 6         | 44         | 4          |      | 18      | 57      | 51      | 18      | 24  |
| F54D8.6   |         | 1         | 5         | 19        | 7         | 4          | 9          |      | 22      | 27      | 17      | 32      | 19  |
| K04H4.1   | emb-9   | 4         | 38        | 9         | 1         | 9          | 2          |      | 37      | 425     | 117     | 29      | 11  |
| R07B1.10  |         | 90        | 27        | 52        | 10        | 206        | 9          |      | 120     | 198     | 54      | 206     | 25  |
| T06E4.1   | hcp-2   | 1         | 7         | 55        | 11        | 3          | 9          |      | 22      | 44      | 18      | 178     | 23  |
| T11B7.3   |         | 13        | 44        | 10        | 3         | 6          | 2          |      | 35      | 105     | 119     | 14      | 11  |
| T12B5.6   | fbxa-55 | 1         | 1         | 5         | 1         | 3          | 1          |      | 4       | 4       | 3       | 2       | 3   |
| T19D12.4  |         | 2         | 22        | 68        | 2         | 4          | 7          |      | 15      | 39      | 60      | 77      | 24  |
| T22E5.5   | mup-2   | 43        | 76        | 5         | 4         | 85         | 6          |      | 138     | 529     | 239     | 83      | 15  |
| W10G6.2   |         | 3         | 3         | 3         | 1         | 3          | 1          |      | 7       | 11      | 16      | 3       | 3   |
| Y106G6A.2 |         | 3         | 5         | 33        | 10        | 8          | 10         |      | 27      | 20      | 14      | 39      | 21  |
| Y32F6A.5  |         | 9         | 17        | 23        | 13        | 8          | 12         |      | 30      | 37      | 43      | 152     | 26  |
| Y38A8.2   | pbs-3   | 13        | 13        | 24        | 26        | 28         | 31         |      | 159     | 121     | 35      | 255     | 67  |
| Y43F8C.13 |         | 7         | 11        | 4         | 2         | 3          | 1          |      | 21      | 30      | 25      | 12      | 4   |
| Y53C10A.5 |         | 3         | 9         | 24        | 1         | 20         | 1          |      | 21      | 22      | 24      | 3       | 2   |
| ZK265.9   |         | 2         | 6         | 13        | 4         | 37         | 7          |      | 44      | 66      | 20      | 75      | 26  |
| ZK270.2   | frm-1   | 1         | 13        | 77        | 7         | 8          | 9          |      | 30      | 65      | 28      | 89      | 19  |
| ZK6.10    | dod-19  | 26        | 51        | 45        | 7         | 67         | 10         |      | 137     | 165     | 148     | 36      | 47  |
| ZK6.11    |         | 13        | 61        | 4         | 3         | 4          | 6          |      | 190     | 173     | 291     | 45      | 23  |
| ZK973.6   |         | 6         | 31        | 37        | 33        | 7          | 16         |      | 24      | 122     | 95      | 84      | 65  |

Note: all counts were normalized to 1M tags

### Supplementary Table 4B

Genes consistently down-regulated in *daf-2;fer-15* adults when compared to normal-lived *C. elegans*.

Abbreviations: D2 = *daf-2*, F15 = *fer-15*, D\_x = Day\_x, N2YA = N2 Young Adults.

| <b>CDS</b> | <b>Gene</b> | <b>DAU_1</b> | <b>DAU_2</b> | <b>ODAU</b> | <b>N2YA</b> | <b>F15D1_1</b> | <b>F15D1_2</b> | <b>F15D6_1</b> | <b>F15D6_2</b> |
|------------|-------------|--------------|--------------|-------------|-------------|----------------|----------------|----------------|----------------|
| AC7.2      | soc-2       | 11           | 10           | 10          | 0           | 7              | 7              | 1              | 1              |
| B0001.6    |             | 254          | 76           | 344         | 13          | 34             | 21             | 123            | 38             |
| B0024.14   | crm-1       | 143          | 18           | 117         | 3           | 5              | 9              | 7              | 14             |
| B0213.4    | nlp-29      | 45           | 92           | 128         | 16          | 28             | 28             | 40             | 15             |
| B0222.1    |             | 11           | 14           | 38          | 2           | 1              | 0              | 0              | 1              |
| B0244.2    | ida-1       | 559          | 688          | 455         | 27          | 36             | 67             | 10             | 38             |
| B0252.8    |             | 63           | 49           | 43          | 6           | 14             | 13             | 1              | 0              |
| B0280.8    | nhr-10      | 27           | 28           | 23          | 11          | 5              | 12             | 9              | 33             |
| B0395.2    |             | 17           | 14           | 12          | 0           | 6              | 9              | 0              | 0              |
| B0412.2    | daf-7       | 35           | 18           | 25          | 0           | 3              | 1              | 1              | 0              |
| B0457.6    |             | 24           | 21           | 28          | 12          | 12             | 0              | 12             | 4              |
| B0491.8    | clh-2       | 10           | 14           | 13          | 0           | 2              | 0              | 0              | 0              |
| B0507.10   |             | 11           | 71           | 12          | 0           | 5              | 0              | 5              | 4              |
| B0511.5    |             | 522          | 16           | 366         | 1           | 2              | 0              | 0              | 0              |
| C01B7.1    |             | 77           | 23           | 53          | 2           | 14             | 2              | 1              | 3              |
| C01B7.4    | tag-117     | 62           | 42           | 48          | 2           | 3              | 11             | 10             | 17             |
| C02C6.2    |             | 25           | 10           | 15          | 5           | 2              | 8              | 13             | 8              |
| C04A11.4   | adm-2       | 10           | 17           | 22          | 2           | 3              | 2              | 9              | 2              |
| C04A11.5   |             | 17           | 12           | 15          | 0           | 3              | 0              | 2              | 0              |
| C04F12.8   |             | 11           | 11           | 30          | 2           | 4              | 0              | 4              | 0              |
| C05D9.9    |             | 80           | 22           | 52          | 3           | 11             | 1              | 0              | 1              |
| C05E11.4   | amt-1       | 16           | 36           | 14          | 0           | 0              | 0              | 0              | 0              |
| C05E11.8   |             | 61           | 68           | 70          | 7           | 8              | 10             | 11             | 10             |
| C05E7.3    |             | 50           | 44           | 49          | 0           | 1              | 1              | 8              | 2              |
| C06A12.3   |             | 26           | 37           | 27          | 11          | 8              | 14             | 0              | 40             |
| C06A8.9    | glr-4       | 10           | 18           | 11          | 2           | 3              | 2              | 0              | 2              |
| C06E1.10   | rha-2       | 20           | 18           | 11          | 3           | 3              | 5              | 3              | 12             |
| C06E4.7    |             | 10           | 15           | 11          | 0           | 0              | 0              | 0              | 0              |
| C07A12.2   |             | 26           | 43           | 29          | 1           | 1              | 0              | 1              | 3              |
| C09E10.2   | dgk-1       | 34           | 30           | 24          | 1           | 8              | 3              | 1              | 0              |
| C11D2.2    |             | 10           | 204          | 10          | 0           | 0              | 0              | 0              | 0              |
| C11E4.2    |             | 63           | 141          | 219         | 0           | 22             | 34             | 4              | 13             |
| C12D8.4    | ttr-19      | 23           | 48           | 13          | 0           | 0              | 0              | 0              | 0              |
| C13A10.2   |             | 43           | 42           | 26          | 3           | 1              | 0              | 1              | 0              |
| C13B9.4    |             | 27           | 10           | 29          | 0           | 7              | 0              | 1              | 0              |
| C13C4.2    | nhr-154     | 24           | 12           | 18          | 2           | 5              | 0              | 2              | 5              |
| C13G3.1    |             | 68           | 21           | 51          | 10          | 2              | 0              | 6              | 42             |
| C13G5.1    | ceh-16      | 26           | 23           | 15          | 3           | 1              | 0              | 8              | 11             |
| C14F11.3   | lite-1      | 14           | 15           | 37          | 0           | 1              | 2              | 2              | 1              |
| C14F5.3    | tnt-3       | 131          | 55           | 208         | 2           | 11             | 19             | 7              | 0              |
| C15A11.7   |             | 166          | 100          | 135         | 32          | 28             | 21             | 6              | 20             |
| C16C4.17   |             | 16           | 27           | 10          | 0           | 0              | 0              | 0              | 1              |
| C18A11.1   |             | 131          | 57           | 95          | 9           | 7              | 7              | 13             | 11             |
| C18A11.2   |             | 19           | 12           | 23          | 3           | 2              | 4              | 8              | 2              |
| C18A3.9    |             | 138          | 45           | 55          | 15          | 6              | 7              | 4              | 85             |
| C18D1.3    | flp-4       | 56           | 61           | 31          | 2           | 6              | 12             | 8              | 2              |
| C18E9.1    | cal-2       | 94           | 103          | 66          | 6           | 7              | 24             | 1              | 12             |
| C18H7.1    |             | 55           | 176          | 45          | 0           | 0              | 0              | 0              | 0              |
| C25A1.11   | aha-1       | 23           | 11           | 15          | 6           | 5              | 0              | 9              | 6              |

|           |          |      |     |      |     |     |    |     |     |
|-----------|----------|------|-----|------|-----|-----|----|-----|-----|
| C25E10.2  | cyp-33B1 | 16   | 29  | 12   | 0   | 0   | 0  | 0   | 0   |
| C25E10.5  |          | 17   | 36  | 11   | 3   | 4   | 2  | 2   | 15  |
| C25F6.2   | dlg-1    | 21   | 31  | 21   | 2   | 19  | 17 | 58  | 27  |
| C25H3.10  |          | 127  | 83  | 101  | 12  | 9   | 2  | 2   | 20  |
| C25H3.5   | flp-27   | 10   | 24  | 21   | 2   | 6   | 1  | 8   | 0   |
| C26D10.6  |          | 14   | 14  | 16   | 4   | 4   | 0  | 1   | 1   |
| C26F1.10  | flp-21   | 121  | 102 | 90   | 2   | 7   | 7  | 1   | 1   |
| C27B7.7   |          | 43   | 14  | 47   | 6   | 5   | 0  | 3   | 3   |
| C27B7.9   |          | 714  | 248 | 348  | 29  | 10  | 12 | 62  | 87  |
| C27H2.2   |          | 15   | 32  | 14   | 8   | 7   | 3  | 3   | 6   |
| C27H5.8   | glc-4    | 30   | 53  | 23   | 1   | 8   | 16 | 1   | 10  |
| C28D4.9   | nhr-138  | 19   | 13  | 13   | 5   | 9   | 0  | 7   | 5   |
| C28F5.2   |          | 23   | 20  | 21   | 0   | 2   | 2  | 0   | 2   |
| C30F12.6  |          | 41   | 48  | 25   | 4   | 7   | 11 | 10  | 12  |
| C30F8.4   | kin-32   | 11   | 10  | 12   | 3   | 6   | 2  | 2   | 2   |
| C30G4.7   |          | 21   | 36  | 19   | 1   | 8   | 7  | 1   | 4   |
| C30G7.1   | hil-1    | 143  | 161 | 88   | 2   | 10  | 8  | 6   | 66  |
| C31B8.4   |          | 17   | 10  | 19   | 0   | 1   | 0  | 2   | 0   |
| C32F10.4  |          | 1586 | 68  | 1454 | 11  | 15  | 15 | 12  | 27  |
| C33A11.1  |          | 19   | 30  | 64   | 8   | 11  | 2  | 47  | 0   |
| C33A11.4  | tag-97   | 15   | 22  | 30   | 0   | 1   | 7  | 0   | 3   |
| C33A12.2  | nlp-35   | 8    | 15  | 25   | 0   | 4   | 1  | 2   | 0   |
| C33A12.4  |          | 30   | 85  | 42   | 16  | 5   | 15 | 7   | 36  |
| C33G8.6   | nhr-42   | 11   | 12  | 14   | 2   | 7   | 5  | 2   | 7   |
| C34C6.6   | prx-5    | 18   | 22  | 59   | 5   | 8   | 6  | 2   | 0   |
| C34E11.3  | tag-241  | 16   | 10  | 28   | 5   | 7   | 0  | 0   | 3   |
| C34F11.8  |          | 0    | 8   | 2    | 5   | 1   | 3  | 11  | 8   |
| C35C5.9   |          | 41   | 143 | 116  | 16  | 24  | 24 | 54  | 7   |
| C37C3.12  |          | 24   | 11  | 16   | 0   | 4   | 3  | 0   | 0   |
| C37C3.8   | tag-253  | 27   | 13  | 79   | 9   | 8   | 0  | 55  | 0   |
| C37F5.1   | lin-1    | 46   | 20  | 38   | 5   | 11  | 2  | 6   | 6   |
| C38H2.1   |          | 27   | 28  | 20   | 0   | 3   | 17 | 1   | 9   |
| C39D10.11 |          | 11   | 20  | 15   | 9   | 9   | 9  | 2   | 2   |
| C40C9.5   | nlg-1    | 17   | 19  | 15   | 0   | 3   | 6  | 4   | 0   |
| C41D7.2   | ptr-3    | 28   | 14  | 25   | 0   | 3   | 9  | 0   | 0   |
| C44B7.6   |          | 36   | 37  | 61   | 0   | 2   | 6  | 8   | 7   |
| C44H9.8   |          | 29   | 13  | 27   | 5   | 4   | 3  | 75  | 46  |
| C45G9.13  |          | 290  | 207 | 246  | 39  | 28  | 34 | 29  | 24  |
| C46H11.10 |          | 35   | 13  | 21   | 0   | 2   | 0  | 0   | 0   |
| C48B6.6   | smg-1    | 30   | 31  | 44   | 6   | 11  | 18 | 3   | 20  |
| C49C3.8   |          | 22   | 29  | 15   | 7   | 3   | 7  | 4   | 6   |
| C49H3.5   | ntl-4    | 95   | 17  | 66   | 8   | 8   | 1  | 8   | 14  |
| C50A2.3   |          | 24   | 23  | 20   | 12  | 8   | 6  | 2   | 6   |
| C50D2.6   |          | 20   | 15  | 15   | 1   | 1   | 6  | 1   | 9   |
| C50E3.6   |          | 17   | 13  | 10   | 0   | 9   | 5  | 0   | 0   |
| C52A11.4  | mpz-1    | 98   | 95  | 86   | 5   | 15  | 27 | 1   | 25  |
| C52D10.11 | flp-17   | 32   | 11  | 19   | 0   | 1   | 3  | 1   | 4   |
| C52E12.2  | unc-104  | 21   | 75  | 82   | 8   | 13  | 9  | 8   | 2   |
| C53B7.3   |          | 285  | 637 | 203  | 101 | 102 | 77 | 188 | 579 |
| C53D5.1   |          | 46   | 43  | 26   | 10  | 15  | 17 | 7   | 70  |

|           |          |     |     |     |    |    |    |    |    |
|-----------|----------|-----|-----|-----|----|----|----|----|----|
| C54F6.5   |          | 131 | 234 | 67  | 1  | 0  | 23 | 7  | 82 |
| CC4.2     | nlp-15   | 49  | 22  | 74  | 2  | 3  | 2  | 3  | 0  |
| DH11.4    |          | 10  | 12  | 10  | 0  | 3  | 6  | 2  | 0  |
| E01G4.5   |          | 59  | 33  | 54  | 1  | 2  | 1  | 42 | 18 |
| E01G6.2   |          | 24  | 46  | 11  | 1  | 2  | 4  | 1  | 2  |
| E01H11.3  | flp-20   | 32  | 24  | 32  | 0  | 7  | 1  | 8  | 1  |
| E02A10.4  |          | 120 | 38  | 129 | 3  | 6  | 7  | 3  | 0  |
| E02H1.1   |          | 166 | 132 | 110 | 30 | 14 | 38 | 7  | 54 |
| EEED8.2   |          | 15  | 11  | 14  | 3  | 2  | 0  | 14 | 5  |
| F01D4.8   |          | 286 | 175 | 231 | 0  | 0  | 0  | 0  | 6  |
| F01G10.8  | daf-14   | 25  | 12  | 19  | 5  | 4  | 2  | 4  | 4  |
| F02A9.1   |          | 20  | 16  | 19  | 2  | 3  | 3  | 0  | 0  |
| F02C12.5  | cyp-13B1 | 53  | 84  | 43  | 1  | 4  | 1  | 1  | 5  |
| F08B1.3   |          | 78  | 23  | 48  | 14 | 11 | 10 | 5  | 42 |
| F08B12.3  | slo-2    | 13  | 17  | 9   | 3  | 6  | 4  | 1  | 0  |
| F08G5.3   |          | 39  | 22  | 24  | 3  | 6  | 1  | 0  | 0  |
| F09C3.2   |          | 27  | 31  | 24  | 3  | 8  | 11 | 3  | 4  |
| F09E5.16  |          | 37  | 234 | 31  | 6  | 12 | 17 | 4  | 19 |
| F09F7.7   |          | 904 | 116 | 834 | 16 | 17 | 28 | 17 | 44 |
| F10B5.3   |          | 117 | 44  | 100 | 0  | 0  | 0  | 0  | 0  |
| F10B5.4   | tub-1    | 15  | 11  | 11  | 0  | 3  | 6  | 1  | 0  |
| F10E7.9   |          | 26  | 34  | 25  | 1  | 7  | 2  | 1  | 3  |
| F11H8.4   | cyk-1    | 25  | 19  | 30  | 2  | 9  | 7  | 5  | 3  |
| F12F3.1   | exp-2    | 28  | 18  | 36  | 0  | 2  | 4  | 0  | 0  |
| F13B9.5   | ksr-1    | 25  | 46  | 23  | 0  | 8  | 18 | 1  | 12 |
| F13D11.2  |          | 32  | 16  | 22  | 1  | 6  | 5  | 3  | 3  |
| F13D11.3  |          | 105 | 53  | 74  | 3  | 8  | 2  | 0  | 8  |
| F13E9.11  |          | 16  | 11  | 10  | 0  | 0  | 0  | 5  | 1  |
| F13G11.1  |          | 152 | 10  | 127 | 3  | 8  | 0  | 2  | 0  |
| F14D12.4  | mec-2    | 21  | 13  | 15  | 1  | 3  | 2  | 0  | 10 |
| F14F11.2  |          | 59  | 74  | 52  | 3  | 7  | 4  | 0  | 6  |
| F14F3.1   | vab-3    | 11  | 10  | 20  | 1  | 7  | 6  | 13 | 2  |
| F15B9.3   | far-5    | 46  | 32  | 33  | 15 | 5  | 2  | 3  | 7  |
| F16B4.12  | nhr-117  | 20  | 16  | 13  | 2  | 1  | 0  | 1  | 12 |
| F16H6.10  |          | 43  | 13  | 43  | 7  | 8  | 9  | 3  | 0  |
| F16H9.1   | rgs-2    | 49  | 32  | 44  | 3  | 8  | 3  | 0  | 0  |
| F17C11.2  |          | 57  | 147 | 53  | 2  | 14 | 5  | 3  | 11 |
| F18E2.5   | gpa-13   | 25  | 36  | 18  | 4  | 1  | 0  | 0  | 4  |
| F18G5.6   |          | 75  | 56  | 131 | 9  | 18 | 8  | 11 | 37 |
| F19H6.1   | nekl-3   | 81  | 31  | 38  | 16 | 16 | 16 | 2  | 29 |
| F19H6.2   |          | 38  | 45  | 21  | 5  | 4  | 3  | 0  | 4  |
| F20A1.6   |          | 30  | 189 | 24  | 1  | 3  | 0  | 5  | 4  |
| F20B6.8   | hpk-1    | 25  | 25  | 38  | 7  | 18 | 15 | 10 | 8  |
| F20D1.10  | tag-299  | 313 | 314 | 291 | 44 | 60 | 68 | 47 | 65 |
| F21A10.2  |          | 37  | 19  | 36  | 9  | 11 | 12 | 26 | 12 |
| F21A3.2   |          | 45  | 26  | 40  | 2  | 4  | 18 | 9  | 8  |
| F21C10.11 |          | 145 | 94  | 46  | 14 | 21 | 24 | 38 | 65 |
| F21C10.3  |          | 12  | 11  | 24  | 1  | 3  | 0  | 1  | 0  |
| F21D12.3  |          | 64  | 38  | 39  | 0  | 3  | 3  | 0  | 2  |
| F21F3.1   |          | 66  | 30  | 88  | 6  | 14 | 11 | 6  | 4  |

|          |          |     |     |     |    |    |    |     |    |
|----------|----------|-----|-----|-----|----|----|----|-----|----|
| F22B7.9  |          | 37  | 191 | 28  | 15 | 6  | 4  | 8   | 13 |
| F22E12.4 | egl-9    | 35  | 32  | 38  | 10 | 19 | 4  | 3   | 9  |
| F22F1.1  | hil-3    | 807 | 102 | 559 | 17 | 14 | 16 | 16  | 39 |
| F26D12.1 | fkx-7    | 182 | 112 | 129 | 6  | 13 | 20 | 10  | 34 |
| F26F4.3  | rom-1    | 41  | 10  | 32  | 8  | 4  | 9  | 11  | 43 |
| F26G1.2  |          | 31  | 13  | 36  | 2  | 1  | 1  | 160 | 3  |
| F28B4.4  |          | 25  | 12  | 21  | 3  | 1  | 0  | 0   | 0  |
| F28C1.3  |          | 79  | 45  | 82  | 17 | 26 | 14 | 9   | 24 |
| F29F11.5 |          | 19  | 10  | 13  | 0  | 4  | 0  | 0   | 0  |
| F30H5.4  |          | 12  | 100 | 63  | 5  | 5  | 8  | 24  | 6  |
| F31E8.2  | snt-1    | 41  | 20  | 38  | 3  | 8  | 7  | 0   | 0  |
| F32A5.6  | prx-13   | 10  | 11  | 12  | 7  | 3  | 5  | 2   | 0  |
| F34H10.2 |          | 11  | 15  | 14  | 0  | 0  | 0  | 0   | 0  |
| F35B12.9 |          | 86  | 48  | 62  | 4  | 11 | 10 | 10  | 0  |
| F36D3.9  | cpr-2    | 974 | 48  | 909 | 0  | 21 | 0  | 2   | 0  |
| F36F2.1  |          | 84  | 27  | 58  | 5  | 5  | 13 | 0   | 0  |
| F36F2.2  |          | 107 | 176 | 60  | 3  | 2  | 17 | 1   | 41 |
| F36H12.1 |          | 48  | 27  | 118 | 11 | 14 | 0  | 3   | 0  |
| F36H2.5  |          | 32  | 28  | 20  | 2  | 2  | 12 | 0   | 5  |
| F38A6.1  |          | 9   | 54  | 47  | 5  | 7  | 1  | 3   | 1  |
| F39C12.4 |          | 12  | 15  | 10  | 1  | 2  | 0  | 0   | 0  |
| F39H2.1  | flp-22   | 170 | 85  | 113 | 14 | 22 | 20 | 9   | 10 |
| F40G12.5 |          | 42  | 65  | 28  | 0  | 1  | 0  | 3   | 0  |
| F40H3.1  |          | 195 | 232 | 93  | 17 | 9  | 49 | 8   | 70 |
| F41B5.2  | cyp-33C7 | 19  | 18  | 10  | 0  | 1  | 1  | 7   | 6  |
| F41B5.4  | cyp-33C3 | 15  | 10  | 11  | 1  | 4  | 4  | 0   | 2  |
| F42G10.2 | mkk-4    | 13  | 65  | 33  | 6  | 6  | 6  | 3   | 3  |
| F42H10.5 |          | 20  | 15  | 10  | 1  | 4  | 3  | 1   | 0  |
| F43G6.8  |          | 14  | 15  | 35  | 3  | 4  | 2  | 1   | 0  |
| F44A2.5  |          | 178 | 88  | 143 | 7  | 23 | 35 | 3   | 11 |
| F44B9.1  | dpf-6    | 73  | 143 | 77  | 5  | 25 | 5  | 2   | 6  |
| F44C8.3  | nhr-18   | 16  | 12  | 39  | 3  | 6  | 1  | 11  | 2  |
| F44D12.1 |          | 35  | 44  | 25  | 5  | 16 | 14 | 19  | 5  |
| F44G4.8  | dep-1    | 62  | 45  | 44  | 2  | 14 | 18 | 5   | 24 |
| F45D3.3  |          | 298 | 56  | 127 | 26 | 12 | 27 | 3   | 76 |
| F45D3.4  |          | 23  | 11  | 61  | 9  | 7  | 4  | 172 | 24 |
| F45E6.2  | atf-6    | 47  | 38  | 31  | 2  | 2  | 7  | 2   | 15 |
| F45G2.2  |          | 21  | 30  | 22  | 0  | 4  | 5  | 0   | 0  |
| F46A8.7  |          | 14  | 10  | 40  | 0  | 0  | 0  | 0   | 0  |
| F46C3.1  | pek-1    | 39  | 34  | 28  | 16 | 19 | 8  | 6   | 68 |
| F47A4.5  |          | 20  | 53  | 29  | 10 | 9  | 10 | 36  | 16 |
| F47B8.3  |          | 84  | 44  | 58  | 5  | 2  | 8  | 7   | 6  |
| F47D12.1 | gar-2    | 10  | 79  | 24  | 2  | 6  | 9  | 0   | 2  |
| F47E1.1  |          | 36  | 11  | 33  | 0  | 0  | 0  | 1   | 0  |
| F48B9.4  | nlp-37   | 52  | 23  | 41  | 1  | 4  | 0  | 0   | 0  |
| F48C11.3 | nlp-3    | 49  | 75  | 75  | 4  | 11 | 8  | 2   | 4  |
| F48E8.3  |          | 61  | 73  | 203 | 38 | 37 | 18 | 88  | 13 |
| F49E10.3 | flp-7    | 11  | 61  | 26  | 8  | 8  | 7  | 2   | 3  |
| F49E11.6 |          | 64  | 618 | 41  | 0  | 0  | 0  | 0   | 0  |
| F49E2.4  |          | 23  | 10  | 16  | 3  | 4  | 7  | 1   | 0  |

|           |          |      |      |      |     |     |     |     |      |
|-----------|----------|------|------|------|-----|-----|-----|-----|------|
| F53B2.8   |          | 62   | 74   | 129  | 7   | 10  | 7   | 65  | 4    |
| F53G12.1  | rab-11.1 | 3433 | 3125 | 2298 | 981 | 712 | 642 | 692 | 3051 |
| F54B11.5  |          | 23   | 35   | 13   | 9   | 4   | 5   | 20  | 49   |
| F54C9.7   |          | 44   | 11   | 36   | 1   | 1   | 0   | 1   | 0    |
| F54D1.6   |          | 78   | 44   | 55   | 12  | 22  | 26  | 7   | 3    |
| F55C12.4  |          | 46   | 15   | 16   | 1   | 3   | 9   | 0   | 6    |
| F55F3.1   | aakb-1   | 61   | 40   | 32   | 7   | 5   | 18  | 4   | 1    |
| F55H12.3  |          | 38   | 31   | 28   | 11  | 19  | 9   | 2   | 15   |
| F56D5.3   |          | 15   | 15   | 10   | 1   | 1   | 2   | 0   | 1    |
| F56F10.2  |          | 17   | 13   | 23   | 1   | 3   | 4   | 0   | 1    |
| F56F3.6   | ins-17   | 27   | 123  | 60   | 5   | 11  | 14  | 5   | 4    |
| F57A8.1   |          | 68   | 52   | 42   | 5   | 8   | 7   | 12  | 17   |
| F57B1.7   |          | 86   | 35   | 72   | 0   | 1   | 0   | 1   | 0    |
| F57F4.2   |          | 147  | 2338 | 327  | 0   | 0   | 0   | 0   | 0    |
| F57G12.1  |          | 167  | 70   | 138  | 16  | 34  | 28  | 36  | 37   |
| F58A3.1   | ldb-1    | 64   | 24   | 53   | 10  | 12  | 7   | 8   | 3    |
| F58B4.3   |          | 61   | 25   | 56   | 3   | 2   | 7   | 2   | 5    |
| F58B4.6   |          | 10   | 10   | 12   | 1   | 1   | 4   | 0   | 1    |
| F58E10.7  |          | 175  | 246  | 128  | 4   | 4   | 8   | 3   | 7    |
| F58G6.5   | nhr-34   | 24   | 20   | 25   | 11  | 8   | 7   | 4   | 7    |
| F58H1.7   |          | 12   | 10   | 41   | 5   | 4   | 2   | 2   | 0    |
| F58H10.1  |          | 165  | 40   | 109  | 0   | 13  | 17  | 13  | 32   |
| F58H12.1  | kin-29   | 64   | 34   | 58   | 2   | 15  | 6   | 3   | 0    |
| F59A6.1   | nsy-1    | 67   | 23   | 69   | 13  | 11  | 14  | 7   | 14   |
| F59C6.11  |          | 17   | 10   | 14   | 1   | 5   | 0   | 0   | 2    |
| H06O01.3  | ctg-1    | 32   | 20   | 31   | 13  | 16  | 3   | 6   | 15   |
| H41C03.1  |          | 43   | 43   | 31   | 7   | 19  | 9   | 10  | 14   |
| K01A2.10  |          | 141  | 10   | 131  | 1   | 3   | 2   | 2   | 5    |
| K01B6.1   | fozi-1   | 24   | 24   | 19   | 1   | 7   | 0   | 0   | 3    |
| K02D3.1   |          | 64   | 37   | 31   | 1   | 14  | 9   | 5   | 15   |
| K02F2.6   | ser-3    | 47   | 19   | 43   | 4   | 4   | 5   | 1   | 11   |
| K04G11.2  | sel-7    | 98   | 12   | 63   | 0   | 1   | 0   | 0   | 0    |
| K04G7.3   |          | 190  | 147  | 108  | 13  | 8   | 22  | 10  | 44   |
| K04H4.7   | flp-25   | 26   | 11   | 25   | 2   | 3   | 2   | 23  | 2    |
| K07A9.2   | cmk-1    | 21   | 10   | 23   | 1   | 3   | 0   | 0   | 8    |
| K07B1.8   |          | 14   | 3    | 27   | 0   | 1   | 4   | 4   | 5    |
| K08B12.2  |          | 429  | 303  | 295  | 27  | 29  | 34  | 10  | 38   |
| K08E5.2   | nac-3    | 29   | 15   | 20   | 5   | 7   | 2   | 1   | 0    |
| K08F8.6   | let-19   | 79   | 14   | 62   | 6   | 6   | 2   | 6   | 6    |
| K09E4.4   |          | 25   | 27   | 31   | 0   | 3   | 0   | 0   | 2    |
| K09E9.5   |          | 21   | 12   | 14   | 2   | 0   | 3   | 1   | 2    |
| K10D3.2   | unc-14   | 88   | 61   | 86   | 13  | 19  | 5   | 8   | 10   |
| K10D6.4   |          | 22   | 17   | 24   | 6   | 3   | 3   | 14  | 8    |
| K11G9.6   | mtl-1    | 21   | 83   | 41   | 8   | 14  | 1   | 304 | 22   |
| M01G12.12 | rff-2    | 26   | 43   | 27   | 1   | 2   | 0   | 18  | 17   |
| M01H9.3   |          | 481  | 989  | 366  | 79  | 41  | 42  | 66  | 191  |
| M02A10.3  | sli-1    | 32   | 59   | 37   | 7   | 16  | 19  | 8   | 13   |
| M163.1    |          | 133  | 151  | 125  | 8   | 17  | 38  | 18  | 31   |
| M176.5    |          | 42   | 35   | 51   | 12  | 11  | 14  | 1   | 4    |
| M176.8    |          | 56   | 46   | 46   | 7   | 7   | 6   | 4   | 0    |

|          |          |      |     |     |     |     |     |     |     |
|----------|----------|------|-----|-----|-----|-----|-----|-----|-----|
| M79.3    |          | 21   | 23  | 21  | 9   | 8   | 4   | 3   | 13  |
| M79.4    | flp-19   | 21   | 90  | 105 | 6   | 12  | 2   | 3   | 1   |
| MTCE.33  |          | 1438 | 699 | 905 | 48  | 137 | 236 | 119 | 254 |
| R01H2.7  |          | 18   | 16  | 13  | 3   | 4   | 4   | 7   | 4   |
| R02C2.3  | tag-40   | 47   | 257 | 127 | 0   | 0   | 0   | 0   | 0   |
| R03G8.1  |          | 22   | 10  | 17  | 2   | 7   | 3   | 1   | 3   |
| R05C11.4 |          | 17   | 11  | 12  | 1   | 2   | 1   | 0   | 0   |
| R06F6.11 | tag-209  | 16   | 10  | 21  | 1   | 4   | 1   | 2   | 0   |
| R07C12.1 |          | 32   | 47  | 36  | 0   | 2   | 0   | 0   | 0   |
| R09A8.5  |          | 27   | 119 | 21  | 2   | 3   | 6   | 3   | 19  |
| R09B5.11 |          | 36   | 69  | 76  | 4   | 9   | 5   | 2   | 5   |
| R10E4.1  |          | 18   | 13  | 17  | 6   | 9   | 2   | 13  | 34  |
| R10E9.1  | msi-1    | 214  | 433 | 180 | 26  | 41  | 28  | 21  | 79  |
| R11D1.3  |          | 94   | 61  | 85  | 6   | 0   | 31  | 0   | 7   |
| R11F4.1  |          | 11   | 11  | 56  | 3   | 9   | 0   | 181 | 4   |
| R13.4    |          | 152  | 15  | 88  | 7   | 7   | 0   | 8   | 9   |
| R13A5.12 | lpd-7    | 396  | 341 | 885 | 117 | 124 | 51  | 464 | 60  |
| R13H4.5  |          | 38   | 24  | 21  | 1   | 8   | 5   | 0   | 3   |
| R13H8.1  | daf-16   | 241  | 43  | 201 | 29  | 25  | 16  | 56  | 17  |
| R90.5    |          | 21   | 39  | 14  | 0   | 1   | 7   | 0   | 8   |
| T01B6.3  |          | 43   | 52  | 34  | 5   | 3   | 9   | 5   | 23  |
| T01C8.1  | aak-2    | 21   | 26  | 16  | 3   | 4   | 1   | 11  | 14  |
| T01E8.1  |          | 4    | 0   | 2   | 1   | 3   | 1   | 2   | 0   |
| T01G1.2  |          | 40   | 14  | 39  | 1   | 5   | 1   | 5   | 1   |
| T01G6.2  | nhr-131  | 10   | 11  | 10  | 1   | 4   | 1   | 1   | 8   |
| T02C5.5  | unc-2    | 43   | 23  | 32  | 3   | 11  | 9   | 1   | 12  |
| T02E9.1  |          | 13   | 17  | 11  | 0   | 1   | 0   | 0   | 0   |
| T02E9.5  |          | 190  | 50  | 104 | 18  | 11  | 27  | 18  | 23  |
| T03G11.4 |          | 36   | 27  | 25  | 19  | 16  | 19  | 9   | 31  |
| T04A8.4  | tag-243  | 71   | 33  | 262 | 2   | 13  | 1   | 7   | 0   |
| T04B2.5  |          | 119  | 63  | 71  | 26  | 32  | 16  | 7   | 22  |
| T04C12.7 |          | 55   | 41  | 55  | 1   | 4   | 3   | 0   | 3   |
| T05A6.1  | cki-1    | 32   | 26  | 29  | 4   | 12  | 18  | 10  | 21  |
| T05B4.12 |          | 13   | 80  | 38  | 0   | 0   | 0   | 0   | 0   |
| T05C1.4  |          | 13   | 70  | 27  | 4   | 6   | 6   | 17  | 2   |
| T06A1.7  | fipr-25  | 18   | 33  | 19  | 0   | 0   | 0   | 0   | 0   |
| T06F4.1  |          | 10   | 19  | 24  | 4   | 8   | 5   | 2   | 0   |
| T08B1.4  |          | 3    | 0   | 1   | 0   | 0   | 0   | 0   | 0   |
| T09F3.1  |          | 54   | 26  | 31  | 7   | 9   | 4   | 1   | 5   |
| T09H2.1  | cyp-34A4 | 33   | 13  | 43  | 0   | 2   | 6   | 7   | 8   |
| T10H10.3 |          | 11   | 24  | 13  | 2   | 7   | 0   | 2   | 6   |
| T10H4.11 | cyp-34A2 | 30   | 54  | 62  | 0   | 0   | 5   | 0   | 0   |
| T12A7.2  |          | 55   | 24  | 46  | 2   | 9   | 0   | 2   | 0   |
| T12G3.1  |          | 45   | 32  | 136 | 8   | 14  | 1   | 237 | 4   |
| T13A10.5 | nlp-16   | 40   | 49  | 28  | 0   | 5   | 1   | 6   | 6   |
| T13H5.1  |          | 10   | 11  | 17  | 2   | 9   | 8   | 2   | 3   |
| T14B1.1  |          | 24   | 44  | 20  | 0   | 4   | 10  | 3   | 0   |
| T14D7.2  |          | 307  | 412 | 180 | 36  | 53  | 76  | 16  | 49  |
| T14F9.4  | peb-1    | 35   | 10  | 42  | 0   | 7   | 0   | 1   | 0   |
| T19A6.2  | ngp-1    | 175  | 76  | 147 | 9   | 10  | 30  | 10  | 8   |



|            |        |     |     |     |    |    |    |    |    |
|------------|--------|-----|-----|-----|----|----|----|----|----|
| T19E7.6    |        | 21  | 55  | 23  | 7  | 16 | 14 | 5  | 20 |
| T20B5.3    | oga-1  | 18  | 15  | 17  | 7  | 8  | 8  | 5  | 4  |
| T20D4.6    |        | 12  | 11  | 13  | 3  | 2  | 7  | 0  | 1  |
| T21D12.9   |        | 43  | 21  | 26  | 7  | 14 | 13 | 7  | 12 |
| T21E3.3    | lrp-2  | 31  | 26  | 34  | 7  | 16 | 13 | 14 | 31 |
| T22B11.3   |        | 75  | 18  | 56  | 0  | 1  | 8  | 0  | 0  |
| T22B2.4    | sup-12 | 61  | 41  | 63  | 5  | 25 | 23 | 2  | 6  |
| T22C8.3    |        | 29  | 26  | 19  | 6  | 7  | 0  | 6  | 28 |
| T22H6.7    | abf-6  | 13  | 18  | 13  | 2  | 8  | 7  | 6  | 3  |
| T23D8.2    | tsp-7  | 0   | 0   | 0   | 0  | 0  | 0  | 0  | 0  |
| T23E7.6    |        | 10  | 23  | 11  | 0  | 7  | 3  | 7  | 74 |
| T23F2.2    |        | 19  | 12  | 23  | 0  | 3  | 1  | 0  | 0  |
| T23F2.4    |        | 100 | 105 | 68  | 0  | 2  | 0  | 5  | 10 |
| T23H2.2    | snt-4  | 224 | 107 | 185 | 8  | 19 | 28 | 4  | 12 |
| T24A11.2   | xbx-5  | 10  | 10  | 21  | 1  | 5  | 0  | 0  | 3  |
| T25B9.8    |        | 23  | 21  | 26  | 12 | 8  | 18 | 8  | 34 |
| T25D10.3   | spp-11 | 17  | 145 | 13  | 0  | 0  | 0  | 0  | 0  |
| T26G10.5   |        | 74  | 26  | 60  | 2  | 1  | 2  | 0  | 0  |
| T27C4.1    |        | 78  | 77  | 214 | 6  | 17 | 1  | 14 | 0  |
| T27F6.8    |        | 21  | 83  | 46  | 1  | 2  | 0  | 13 | 0  |
| T28B4.4    |        | 51  | 22  | 49  | 3  | 8  | 0  | 4  | 6  |
| T28F2.2    |        | 10  | 10  | 10  | 5  | 3  | 5  | 2  | 7  |
| VC5.2      |        | 88  | 141 | 83  | 11 | 17 | 9  | 4  | 8  |
| W01A11.6   | moc-2  | 115 | 63  | 126 | 7  | 7  | 29 | 3  | 13 |
| W02A11.3   |        | 15  | 10  | 13  | 5  | 7  | 5  | 28 | 10 |
| W02C12.2   |        | 20  | 49  | 16  | 2  | 5  | 6  | 0  | 0  |
| W07A12.4   |        | 11  | 18  | 20  | 1  | 1  | 0  | 0  | 1  |
| W07E11.3   | flp-2  | 42  | 133 | 133 | 9  | 17 | 0  | 6  | 3  |
| W09C5.5    |        | 33  | 17  | 17  | 5  | 9  | 3  | 10 | 49 |
| W10D5.1    | mef-2  | 29  | 24  | 35  | 1  | 7  | 10 | 1  | 0  |
| W10G11.2   |        | 27  | 93  | 18  | 1  | 2  | 1  | 2  | 0  |
| Y102A11A.2 |        | 23  | 26  | 27  | 0  | 3  | 3  | 1  | 0  |
| Y110A2AL.4 |        | 221 | 67  | 118 | 3  | 0  | 0  | 29 | 12 |
| Y113G7A.16 |        | 45  | 22  | 32  | 0  | 0  | 0  | 0  | 0  |
| Y12A6A.2   |        | 47  | 55  | 34  | 1  | 1  | 11 | 0  | 1  |
| Y15E3A.5   |        | 18  | 15  | 39  | 3  | 6  | 0  | 26 | 0  |
| Y22F5A.6   | lys-3  | 27  | 130 | 60  | 0  | 1  | 0  | 92 | 0  |
| Y23B4A.2   |        | 29  | 16  | 17  | 2  | 3  | 4  | 1  | 0  |
| Y32H12A.8  |        | 21  | 10  | 34  | 7  | 8  | 2  | 6  | 2  |
| Y34F4.2    |        | 55  | 53  | 38  | 0  | 4  | 11 | 5  | 6  |
| Y37A1A.2   |        | 14  | 15  | 20  | 8  | 5  | 7  | 4  | 0  |
| Y37D8A.15  | flp-14 | 40  | 59  | 91  | 10 | 21 | 11 | 32 | 5  |
| Y39H10A.1  |        | 34  | 11  | 44  | 0  | 0  | 0  | 3  | 0  |
| Y40C5A.4   |        | 28  | 30  | 26  | 0  | 1  | 0  | 1  | 2  |
| Y44A6C.1   |        | 93  | 128 | 65  | 6  | 5  | 28 | 11 | 24 |
| Y45F10A.5  | nlp-17 | 60  | 27  | 51  | 7  | 2  | 17 | 4  | 0  |
| Y45F10A.7  |        | 10  | 13  | 10  | 2  | 4  | 7  | 5  | 0  |
| Y47D3A.27  | teg-1  | 29  | 32  | 30  | 9  | 7  | 15 | 5  | 50 |
| Y47D3B.2   | nlp-21 | 44  | 29  | 37  | 3  | 5  | 4  | 8  | 0  |
| Y47G6A.7   |        | 61  | 24  | 142 | 16 | 9  | 0  | 5  | 3  |

|            |        |     |     |     |    |    |    |    |     |
|------------|--------|-----|-----|-----|----|----|----|----|-----|
| Y48A6A.1   | zig-5  | 41  | 39  | 48  | 2  | 4  | 2  | 5  | 0   |
| Y48D7A.2   | flp-18 | 16  | 26  | 50  | 4  | 9  | 1  | 16 | 0   |
| Y48E1B.9   |        | 84  | 44  | 80  | 15 | 6  | 6  | 97 | 28  |
| Y4C6B.2    |        | 41  | 390 | 60  | 1  | 5  | 12 | 2  | 8   |
| Y50D4A.5   |        | 27  | 30  | 25  | 15 | 11 | 18 | 3  | 40  |
| Y50E8A.16  | haf-7  | 12  | 14  | 33  | 4  | 5  | 9  | 8  | 4   |
| Y51A2A.11  |        | 30  | 326 | 20  | 0  | 0  | 0  | 0  | 0   |
| Y51H4A.17  |        | 23  | 10  | 14  | 3  | 1  | 2  | 1  | 2   |
| Y54E10BR.4 |        | 224 | 44  | 185 | 20 | 14 | 28 | 41 | 20  |
| Y54G2A.29  |        | 25  | 22  | 14  | 0  | 5  | 7  | 2  | 0   |
| Y57G11A.4  |        | 30  | 13  | 25  | 4  | 6  | 1  | 0  | 0   |
| Y60C6A.1   |        | 10  | 517 | 32  | 0  | 0  | 0  | 0  | 1   |
| Y69A2AR.7  |        | 19  | 34  | 40  | 14 | 7  | 5  | 38 | 4   |
| Y71F9B.5   | lin-17 | 21  | 14  | 30  | 4  | 8  | 0  | 7  | 2   |
| Y71H9A.3   | sto-4  | 10  | 15  | 13  | 4  | 6  | 2  | 15 | 9   |
| Y73B6BL.35 |        | 32  | 18  | 37  | 0  | 6  | 7  | 1  | 4   |
| Y73F8A.11  |        | 16  | 53  | 53  | 7  | 5  | 9  | 7  | 2   |
| Y75B8A.2   | nob-1  | 66  | 18  | 62  | 9  | 7  | 0  | 7  | 6   |
| Y76A2B.6   |        | 417 | 168 | 208 | 37 | 18 | 43 | 28 | 336 |
| Y82E9BR.23 |        | 49  | 20  | 33  | 3  | 7  | 4  | 0  | 0   |
| Y9C2UA.1   |        | 35  | 12  | 38  | 1  | 7  | 4  | 0  | 0   |
| ZC190.4    |        | 101 | 55  | 86  | 2  | 20 | 19 | 0  | 5   |
| ZC443.3    |        | 175 | 64  | 117 | 4  | 4  | 8  | 11 | 52  |
| ZC443.4    |        | 86  | 19  | 69  | 0  | 1  | 8  | 4  | 6   |
| ZK131.2    | his-25 | 191 | 13  | 116 | 2  | 5  | 2  | 2  | 6   |
| ZK1320.10  | nlp-11 | 336 | 187 | 310 | 14 | 33 | 22 | 6  | 9   |
| ZK154.6    |        | 51  | 36  | 43  | 12 | 13 | 5  | 31 | 29  |
| ZK381.5    | prkl-1 | 33  | 19  | 20  | 1  | 4  | 2  | 2  | 5   |
| ZK524.2    | unc-13 | 36  | 11  | 33  | 1  | 8  | 8  | 1  | 0   |
| ZK525.1    | flp-15 | 202 | 74  | 107 | 10 | 16 | 9  | 19 | 16  |
| ZK593.6    | lgg-2  | 89  | 10  | 84  | 8  | 9  | 1  | 11 | 19  |
| ZK643.8    | grl-25 | 15  | 590 | 11  | 0  | 0  | 0  | 0  | 0   |
| ZK84.6     | ins-6  | 86  | 32  | 64  | 4  | 6  | 13 | 3  | 3   |
| ZK863.8    |        | 51  | 30  | 40  | 2  | 9  | 15 | 6  | 24  |
| ZK867.1    |        | 38  | 28  | 32  | 1  | 7  | 7  | 3  | 6   |
| ZK970.1    |        | 46  | 60  | 35  | 2  | 6  | 15 | 4  | 1   |

Note: all counts were normalized to 1M tags

### Supplementary Table 5A

Genes consistently up-regulated in dauer larvae when compared to normal-lived *C. elegans*.

Abbreviations: DAU = dauer (ODAU = Old dauer, 14-day), F15 = *fer-15*, D\_x = Day\_x, N2YA = N2 Young Adults.

| <i>CDS</i> | <i>Gene</i> | <i>DAU_1</i> | <i>DAU_2</i> | <i>ODAU</i> | <i>N2YA</i> | <i>F15D1_1</i> | <i>F15D1_2</i> | <i>F15D6_1</i> | <i>F15D6_2</i> |
|------------|-------------|--------------|--------------|-------------|-------------|----------------|----------------|----------------|----------------|
| C03C10.3   | rnr-2       | 14           | 24           | 16          | 749         | 197            | 351            | 335            | 2047           |
| C07H6.5    | cgh-1       | 54           | 13           | 40          | 471         | 418            | 347            | 559            | 346            |
| C16C10.11  |             | 22           | 172          | 95          | 267         | 629            | 378            | 385            | 93             |
| C17F4.7    |             | 158          | 9            | 182         | 948         | 767            | 1256           | 528            | 131            |
| C18G1.4    |             | 22           | 18           | 15          | 126         | 142            | 354            | 36             | 574            |
| C24F3.1    | tram-1      | 64           | 102          | 46          | 197         | 253            | 580            | 515            | 366            |
| C52E4.2    | mif-2       | 15           | 65           | 38          | 203         | 218            | 218            | 39             | 39             |
| F09E5.15   |             | 396          | 483          | 387         | 2285        | 1008           | 1363           | 1964           | 2464           |
| F19C7.1    |             | 60           | 334          | 57          | 770         | 889            | 1140           | 203            | 688            |
| F35C5.6    | clec-63     | 192          | 137          | 136         | 467         | 1025           | 749            | 535            | 200            |
| F37D6.1    | mus-101     | 19           | 10           | 17          | 24          | 32             | 27             | 43             | 38             |
| F52E1.14   |             | 83           | 30           | 108         | 1192        | 892            | 389            | 193            | 277            |
| F54G8.3    | ina-1       | 18           | 14           | 16          | 27          | 28             | 30             | 14             | 39             |
| F57F4.4    |             | 124          | 245          | 92          | 747         | 779            | 1063           | 14             | 85             |
| F59B8.2    |             | 14           | 77           | 39          | 487         | 429            | 280            | 82             | 156            |
| H06H21.8   |             | 19           | 12           | 15          | 34          | 35             | 34             | 2              | 10             |
| K01G5.7    | tbb-1       | 61           | 86           | 54          | 200         | 279            | 322            | 317            | 325            |
| K02F3.11   | rnp-5       | 11           | 10           | 19          | 46          | 34             | 23             | 85             | 26             |
| M03F4.7    | calu-1      | 23           | 207          | 36          | 340         | 490            | 544            | 111            | 166            |
| M04F3.1    | rpa-2       | 11           | 11           | 14          | 40          | 33             | 107            | 62             | 161            |
| R05G6.7    |             | 74           | 167          | 188         | 518         | 636            | 498            | 247            | 251            |
| R09A1.1    | ergo-1      | 14           | 13           | 12          | 40          | 27             | 26             | 116            | 190            |
| T04C12.6   | act-1       | 33           | 232          | 84          | 388         | 1073           | 766            | 79             | 46             |
| T09A5.15   |             | 15           | 11           | 11          | 35          | 20             | 23             | 3              | 37             |
| T21H3.1    |             | 6            | 33           | 25          | 240         | 474            | 145            | 1424           | 69             |
| T22D1.5    |             | 24           | 15           | 10          | 501         | 156            | 166            | 167            | 906            |
| T22E5.5    | mup-2       | 18           | 14           | 23          | 138         | 529            | 239            | 83             | 15             |
| W02D3.5    | lbp-6       | 109          | 137          | 96          | 1098        | 828            | 859            | 144            | 153            |
| Y18D10A.17 | car-1       | 98           | 37           | 87          | 402         | 375            | 429            | 505            | 518            |
| Y22F5A.4   | lys-1       | 27           | 66           | 28          | 404         | 546            | 189            | 338            | 63             |
| Y38F2AR.9  |             | 42           | 13           | 23          | 149         | 211            | 193            | 175            | 67             |
| Y39A3CL.3  |             | 15           | 35           | 33          | 241         | 228            | 172            | 199            | 251            |
| Y39E4A.3   |             | 10           | 44           | 12          | 29          | 114            | 389            | 16             | 182            |
| Y57G11C.15 |             | 306          | 286          | 279         | 579         | 991            | 1249           | 75             | 311            |
| Y59A8A.3   |             | 12           | 34           | 45          | 236         | 291            | 167            | 492            | 236            |
| ZC328.3    |             | 10           | 11           | 16          | 20          | 26             | 32             | 6              | 17             |
| ZC328.4    | san-1       | 12           | 11           | 14          | 48          | 22             | 32             | 44             | 58             |
| ZC513.6    | oma-2       | 12           | 23           | 10          | 429         | 149            | 263            | 154            | 2987           |
| ZK6.10     | dod-19      | 8            | 13           | 11          | 137         | 165            | 148            | 36             | 47             |

Note: all counts were normalized to 1M tags

### Supplementary Table 5B

Genes consistently down-regulated in dauer larvae when compared to normal-lived *C. elegans*.

Abbreviations: DAU = dauer (ODAU = Old dauer, 14-day), F15 = *fer-15*, D\_x = Day\_x, N2YA = N2 Young Adults.
