# Supplementary material for: Deep SAGE analysis of the Caenorhabditis elegans transcriptome
Source: PubMed Central journal article supplement — Nucleic Acids Res. 2010 Feb 3;38(10):3252–62. doi: 10.1093/nar/gkq035 (PMC2879516; doi:10.1093/nar/gkq035), 2010-02-03
Supplement: gkq035_4.pdf [file gkq035_4.pdf]

| Library Name               | Total Tags | Tag species | Singletons | Culture | Method  |
|----------------------------|------------|-------------|------------|---------|---------|
| N2 L1 starved              | 101099     | 19290       | 11381      | liquid  | SAGE    |
| N2 L1                      | 94546      | 17252       | 9873       | liquid  | SAGE    |
| N2 L2                      | 116782     | 25517       | 15085      | liquid  | SAGE    |
| N2 L2D                     | 99796      | 16583       | 9387       | liquid  | SAGE    |
| N2 L3                      | 121550     | 23935       | 14962      | liquid  | SAGE    |
| N2 Dauer                   | 55981      | 18134       | 12264      | liquid  | SAGE    |
| N2 Old Dauer               | 92637      | 20185       | 12684      | liquid  | SAGE    |
| fer-15 day1 adults         | 100404     | 18816       | 11333      | liquid  | SAGE    |
| fer-15 day6 adults         | 76397      | 19741       | 10726      | liquid  | SAGE    |
| daf-2;fer-15 day 1 adults  | 87267      | 16740       | 10680      | liquid  | SAGE    |
| daf-2;fer-15 day 6 adults  | 76397      | 13756       | 8644       | liquid  | SAGE    |
| daf-2;fer-15 day 10 adults | 100326     | 19036       | 11781      | liquid  | SAGE    |
| N2 young adults            | 108266     | 21675       | 13114      | plates  | SAGE    |
| N2 L1 starved              | 8983088    | 4478339     | 4077254    | liquid  | Tag-Seq |
| N2 L1                      | 8980037    | 4197940     | 3793024    | liquid  | Tag-Seq |
| N2 L2                      | 9670930    | 1484956     | 1316838    | liquid  | Tag-Seq |
| N2 L2D                     | 9587603    | 900587      | 779109     | liquid  | Tag-Seq |
| N2 L3                      | 9582358    | 4817068     | 4192251    | liquid  | Tag-Seq |
| N2 Dauer                   | 7831182    | 3259687     | 2925069    | liquid  | Tag-Seq |
| N2 Old Dauer               | 5193990    | 5162167     | 4766131    | liquid  | Tag-Seq |
| fer-15 day1 adults         | 8175935    | 3263994     | 2961335    | liquid  | Tag-Seq |
| fer-15 day6 adults         | 8456061    | 6976804     | 6296874    | liquid  | Tag-Seq |
| daf-2;fer-15 day 1 adults  | 8319933    | 4806157     | 4204008    | liquid  | Tag-Seq |
| daf-2;fer-15 day 6 adults  | 8636007    | 3482391     | 3144583    | liquid  | Tag-Seq |
| daf-2;fer-15 day 10 adults | 9407768    | 4010521     | 3592126    | liquid  | Tag-Seq |
| N2 young adults            | 8101104    | 3399336     | 3074947    | plates  | Tag-Seq |
| N2 L1 starved (rep. 2)     | 4198373    | 4785844     | 4415446    | liquid  | Tag-Seq |
| N2 L1 (rep. 2)             | 8954109    | 4557574     | 4166944    | liquid  | Tag-Seq |
| N2 L1 starved (rep. 3)     | 11218178   | 494217      | 448441     | liquid  | Tag-Seq |
| N2 L1 (rep.3)              | 12309080   | 1857459     | 1699630    | liquid  | Tag-Seq |
| N2 L2                      | 9263599    | 3940791     | 3530874    | plates  | Tag-Seq |
| N2 L2D                     | 8467149    | 4267002     | 3901244    | plates  | Tag-Seq |
| N2 L3                      | 8200695    | 4156689     | 3759265    | plates  | Tag-Seq |
| N2 Dauer                   | 12926815   | 1742753     | 1556271    | plates  | Tag-Seq |
| fer-15 day1 adults         | 8228005    | 3732263     | 3389635    | plates  | Tag-Seq |

### Supplementary Table 6

SAGE and Tag-Seq libraries used in this study.
